# Supplementary material
Source: publisher site journal article supplement (https://www.dovepress.com/get_supplementary_file.php?f=273244.docx)
Supplement: Supplementary file 1 [file get_supplementary_file.php]

**Supplement table 1. Baseline characteristics of the patients in the training cohort and the validation cohort stratified by outcome**

|  |  | Training Cohort | | | P Value | Validation Cohort | | P Value |
| --- | --- | --- | --- | --- | --- | --- | --- | --- |
|  |  | **With AKD** | **Without AKD** |  | **With AKD** | **Without AKD** |
| Variable |  | N = 73, (%) | N = 192, (%) |  | N= 32, (%) | N= 81, (%) |
| Age, yr |  |  |  |  |  |  |  |  |
| ≤60 |  | 45 (61.6) | 132 (68.8) |  | 0.272 | 18 (56.3) | 55 (67.9) | 0.243 |
| >60 |  | 28 (38.4) | 60 (31.3) |  |  | 14 (43.8) | 26 (32.1) |  |
| Gender |  |  |  |  |  |  |  |  |
| Male |  | 50 (68.5) | 118 (61.5) |  | 0.288 | 26 (81.3) | 55 (67.9) | 0.156 |
| Female |  | 23 (31.5) | 74 (38.5) |  |  | 6 (18.8) | 26 (32.1) |  |
| Weight, mean (SD), kg |  | 67.9(11.4) | 71.5 (11.3) |  | 0.023 | 70.6(12.6) | 70.2(11.6) | 0.870 |
| CCI |  |  |  |  |  |  |  |  |
| <4 |  | 61 (83.6) | 176 (91.7) |  | 0.055 | 25 (78.1) | 73 (90.1) | 0.123 |
| ≥4 |  | 12 (16.4) | 16 (8.3) |  |  | 7 (21.9) | 8 (9.9) |  |
| Surgery approach |  |  |  |  |  |  |  |  |
| Radical |  | 66(90.4) | 133 (69.3) |  | <0.001 | 5 (15.6) | 39 (48.1) | <0.001 |
| Partial |  | 7(9.6) | 59 (30.7) |  |  | 27 (84.4) | 42 (51.9) |  |
| Preoperative serum creatinine, mean (SD), μmol/L |  | 73.0 (27.6) | 78.1 (62.9) |  | 0.521 | 72.8(21.2) | 74.3(21.3) | 0.926 |
| Preoperative  eGFR, ml/min/1.73m2 |  |  |  |  |  |  |  |  |
| ≥90 |  | 51 (69.9) | 126 (65.6) |  |  | 19 (59.4) | 54 (66.7) |  |
| 60-89 |  | 20 (27.4) | 54 (28.1) |  | 0.500 | 11 (34.4) | 22 (27.2) | 0.742 |
| <60 |  | 2 (2.7) | 12 (6.3) |  |  | 2 (6.3) | 5 (6.2) |  |
| Decrement of eGFR mean (SD), ml/min/1.73m2 |  | 35.4 (15.6) | 21.5(16.1) |  | <0.001 | 29.1(14.6) | 20.3(15.0) | 0.004 |
| Operating time, h |  |  |  |  |  |  |  |  |
| ≤2 |  | 39 (53.4) | 94 (49.0) |  | 0.516 | 7 (21.9) | 26 (32.1) | 0.282 |
| >2 |  | 34 (46.6) | 98 (51.0) |  |  | 25 (78.1) | 55 (67.9) |  |
| Blood loss, ml |  |  |  |  |  |  |  |  |
| <150 |  | 58 (79.5) | 132 (68.8) |  | 0.084 | 26 (81.3) | 59 (72.8) | 0.351 |
| ≥150 |  | 15 (20.5) | 60 (31.3) |  |  | 6 (18.8) | 22 (27.2) |  |
| Intraoperative minimum  SBP, mmHg |  |  |  |  |  |  |  |  |
| >90 |  | 23 (31.5) | 63 (32.8) |  | 0.839 | 11 (34.4) | 22 (27.2) | 0.447 |
| ≤90 |  | 50 (68.5) | 129 (67.2) |  |  | 21 (65.6) | 59 (72.8) |  |
| Time of SBP below 90mmHg in surgery, mean (SD), min |  | 11.4 (18.7) | 13.25(20.6) |  | 0.409 | 8.6 (16.5) | 9.4 (17.0) | 0.585 |
| Intraoperative urinary volume，mean(SD),ml |  | 222.0 (174.9) | 225.1 (199.0) |  | 0.170 | 293.8 (238.6) | 259.5 (207.3) | 0.420 |
| Intraoperative fluid intake volume, mean (SD), ml |  | 1450.7 (645.4) | 1710.4 (1059.2) |  | 0.130 | 1609.4 (1076.8) | 1783.7  (814.3) | 0.037 |
| Pathological type |  |  |  |  |  |  |  |  |
| Clear cell |  | 61 (83.6) | 143 (74.5) |  | 0.408 | 27 (84.4) | 65 (80.2) | 0.199 |
| Papillary cell |  | 1 (1.4) | 8 (4.2) |  |  | 1 (3.1) | 7 (8.6) |  |
| Chromophobe renal cell |  | 3 (4.1) | 10 (5.2) |  |  | 0 (0) | 5 (6.2) |  |
| Others |  | 8 (11.0) | 31 (16.1) |  |  | 4 (12.5) | 4 (4.9) |  |
| Tumor number |  |  |  |  |  |  |  |  |
| Solitary |  | 67 (91.8) | 186(96.9) |  | 0.097 | 31 (96.9) | 80 (98.8) | 1.000 |
| Multiple |  | 6 (8.2) | 6 (3.1) |  |  | 1 (3.1) | 1 (1.2) |  |
| Renal capsule invasion |  |  |  |  |  |  |  |  |
| No |  | 70(95.9) | 179(93.2) |  | 0.568 | 31 (96.9) | 80 (98.8) | 1.000 |
| Yes |  | 3 (4.1) | 13 (6.8) |  |  | 1 (3.1) | 1 (1.2) |  |
| Venous tumor thrombus |  |  |  |  |  |  |  |  |
| No |  | 71(97.3) | 177(92.2) |  | 0.167 | 31 (96.9) | 76 (93.8) | 0.673 |
| Yes |  | 2 (2.7) | 15 (7.8) |  |  | 1 (3.1) | 5 (6.2) |  |
| TNM stage |  |  |  |  |  |  |  |  |
| I-II |  | 66(90.4) | 149(77.6) |  | 0.017 | 26 (81.3) | 71 (87.7) | 0.550 |
| III-IV |  | 7(9.6) | 43 (22.4) |  |  | 6 (18.8) | 10 (12.3) |  |

*Note:* Continuous variables are displayed as median (standard deviation); categorical variables are displayed as number(percentage).

Abbreviations: SD=standard deviation; CCI=Charlson comorbidity index; eGFR=estimated glomerular filtration rate; SBP=systolic blood pressure.

**Supplement table 2. C-index of the nomogram and simple models**

| Model | | Training cohort  C-index (95%CI) |  | Validation cohort  C-index (95%CI) |
| --- | --- | --- | --- | --- |
| Nomogram |  | 0.78(0.71-0.84) |  | 0.76(0.67-0.86) |
| Decrement of eGFR |  | 0.73(0.66-0.79) |  | 0.67(0.56-0.78) |
| CCI |  | 0.54(0.46-0.62) |  | 0.56(0.44-0.68) |
| Surgery approach |  | 0.61(0.53-0.68) |  | 0.68(0.58-0.79) |

Abbreviations: CCI= Charlson comorbidity index; eGFR=estimated glomerular filtration rate；OR=odds ratio; CI=confidence interval.
